# The murine winged-helix transcription factor *Foxl2* is required for granulosa cell differentiation and ovary maintenance

Dirk Schmidt\*, Catherine E. Ovitt\*,†, Katrin Anlag, Sandra Fehsenfeld, Lars Gredsted, Anna-Corina Treier and Mathias Treier‡

Developmental Biology Programme, European Molecular Biology Laboratory, Meyerhofstrasse 1, 69117 Heidelberg, Germany

\*These authors contributed equally to this work

†Present address: Center for Oral Biology, University of Rochester School of Medicine and Dentistry, 601 Elmwood Avenue, Box 611, Rochester, NY 14642, USA

‡Author for correspondence (e-mail: treier@embl.de)

Accepted 5 November 2003

Development 131, 933–942  
Published by The Company of Biologists 2004  
doi:10.1242/dev.00969

## Summary

**Human Blepharophimosis/ptosis/epicanthus inversus syndrome (BPES) type I is an autosomal dominant disorder associated with premature ovarian failure (POF) caused by mutations in *FOXL2*, a winged-helix/forkhead domain transcription factor. Although it has been shown that *FOXL2* is expressed in adult ovaries, its function during folliculogenesis is not known. Here, we show that the murine *Foxl2* gene is essential for granulosa cell differentiation and ovary maintenance. In *Foxl2*<sup>lacZ</sup> homozygous mutant ovaries granulosa cells do not complete the squamous to cuboidal transition leading to the absence of secondary follicles and oocyte atresia. We further demonstrate that activin- $\beta$ A and anti-Müllerian inhibiting hormone expression is absent or strongly**

**diminished in *Foxl2*<sup>lacZ</sup> homozygous mutant ovaries. Unexpectedly, two weeks after birth most if not all oocytes expressed *Gdf9* in *Foxl2*<sup>lacZ</sup> homozygous mutant ovaries, indicating that nearly all primordial follicles have already initiated folliculogenesis at this stage. This activation, in the absence of functional granulosa cells, leads to oocyte atresia and progressive follicular depletion. In addition to providing a molecular mechanism for premature ovarian failure in BPES, these results suggest that granulosa cell function is not only crucial for oocyte growth but also to maintain follicular quiescence in vivo.**

**Key words:** Transcription factor, Forkhead, Winged-helix, Folliculogenesis, Premature ovarian failure

## Introduction

Fertility in women depends on complex molecular events that begin in utero with ovary organogenesis and primordial follicle formation and, after birth, involves the highly coordinated interactions of the hypothalamus, pituitary and ovaries (Apter, 1997; Matzuk and Lamb, 2002). Ovarian failure can vary from a complete failure in germ cell development, resulting in lack of secondary sexual pubertal development (primary amenorrhea), to a reduction in number of germ cells (secondary amenorrhea or premature ovarian failure). Premature ovarian failure (POF) is defined as menopause before age 40 and affects an estimated 1% of women (Pal and Santoro, 2002; Simpson and Rajkovic, 1999).

Several different genetic mechanisms can lead to ovarian failure, including X-chromosomal abnormalities, autosomal recessive genes causing various types of XX gonadal dysgenesis, and autosomal dominant genes (Schlessinger et al., 2002; Sherman, 2000). In contrast to the multiplicity of possible X-linked genes, a single autosomal dominant locus, associated with Blepharophimosis/ptosis/epicanthus inversus syndrome [BPES (MIM 110100)], has been implicated in ovarian failure. BPES type I is characterized by POF and a complex eyelid malformation, whereas BPES type II patients manifest only the eyelid defect. Mutations in *FOXL2*, a forkhead domain/winged-helix (WH) transcription factor, have recently been shown to cause both types of BPES (Crisponi et

al., 2001; De Baere et al., 2001). The infertility is sexually dimorphic. Males remain fertile and transmit the trait to the next generation.

The duration of fertility in a female is determined by the size of the primordial follicle pool formed during fetal life and by the rate of depletion of the pool after birth (Erickson, 2001). Primordial follicles are formed perinatally, as pregranulosa cells encase individual oocytes within the ovary, and the entire germ cell pool available to a female for reproduction is established. The initial stages of folliculogenesis are independent of gonadotropins and involve both cell-autonomous and non-autonomous factors (Hillier, 2001; Kendall et al., 1995). Periodically, several primordial follicles simultaneously enter a growth phase that ultimately leads to ovulation of a mature egg. Little is known about the molecular interaction between germ and somatic cells during primordial follicle formation, or the mechanisms that trigger the selective growth of particular follicles in vivo (Epifano and Dean, 2002; Fortune et al., 2000; Kezele et al., 2002; Smitz and Cortvrindt, 2002); although many novel insights into ovarian follicle development have come from the study of relevant knockout mouse models (Burns and Matzuk, 2002; Matzuk et al., 2002).

We have previously reported isolation of the murine *P-Frk/Foxl2* gene (Treier et al., 1998). Here we demonstrate that the sexually dimorphic ovarian-specific murine *Foxl2* gene is

essential for granulosa cell differentiation and ovary maintenance. In the absence of *Foxl2*, granulosa cell differentiation is blocked at the squamous to cuboidal transition and no secondary follicles are formed. Furthermore, we show that most if not all primordial follicles are activated in *Foxl2<sup>lacZ</sup>* homozygous mutant ovaries as demonstrated by activation of *Gdf9* expression. Concurrently, expression of two inhibitors of primordial follicle activation, activin- $\beta$ A and anti-Mullerian inhibiting substance (*Amh*), is absent or strongly diminished in *Foxl2<sup>lacZ</sup>* homozygous mutant ovaries. We further provide evidence that follicles in *Foxl2<sup>lacZ</sup>* homozygous mutant ovaries, once activated, undergo apoptosis in the absence of functional granulosa cells which leads ultimately to progressive follicular depletion and ovary atresia. Thus, our results suggest that follicular activation is regulated by granulosa cell function in vivo and provide a mechanism to explain the etiology of BPES.

## Materials and methods

### Foxl2 targeting vector

Four overlapping *Foxl2*-positive BAC clones were isolated from a 129 mouse BAC library (Invitrogen/ResGen). A 12.2 kb genomic Asp718 fragment containing *Foxl2* was subcloned. The targeting vector consists of a 3.6 kb 5'-homologous region (*NheI*-*NcoI* fragment) and a 5.6 kb 3'-homologous region (*XhoI*-*BsaBI* fragment). The coding region (amino acids 62-375) was replaced with a *nlacZ* cassette (obtained from S. Tajbakhsh) followed by the self-excisable *neo<sup>r</sup>* cassette (ACN) (obtained from K. R. Thomas). For negative selection, a MC1-DTA (diphtheria toxin A) cassette was placed at the end of the 3'-homologous region.

### Mouse genetics

Mice were housed in specific pathogen-free and light, temperature (21°C) and humidity (50-60% relative humidity) controlled conditions. Food and water were available ad libitum. The procedures for performing animal experiments were in accordance with the principles and guidelines of the LAR/EMBL.

The targeting vector was linearized with *PmeI* and 30  $\mu$ g vector was electroporated into E14 embryonic stem cells according to standard protocols. Cells were selected with G418 after 24 hours. Positive clones were confirmed by Southern blot using 5'- and 3'-outside probes. Two positive clones were microinjected into C57Bl/6J blastocysts and male chimeras were mated with Black Swiss (Taconic) females. Both mouse lines exhibited the same mutant phenotype. All further analysis was performed on a mixed (129/BlackSwiss/CD1) background. The *Foxl2<sup>lacZ</sup>* mutation has been kept by now for nine generations without any change in the phenotypic appearance on this background. Offspring were genotyped either by Southern blot or with PCR using the following primers: wild-type (WT) allele 5'-CAG-ATGATGGCCAGCTACCCCGAGC-3' and 5'-GTTGTGGCGGATGCTATTCTGCCAGCC-3'; mutant allele 5'-GTAGATGGGCGCA-TCGTAACCGTGC-3'. We intercrossed heterozygous offspring to obtain homozygous mutant mice.

### Production of peptide antibody against Foxl2

A peptide antibody was produced against the first 15 aa of *Foxl2* (MMASYPEPEDTAGTL) coupled to KLH and injected into rabbits.

### In situ hybridization

Tissues were fixed in 10% formalin. Hybridization with <sup>35</sup>S-labeled antisense RNA probes was done as previously described (Treier et al., 1998) on 20  $\mu$ m cryosections. Hybridization signals were detected by autoradiography using Kodak NTB-2 liquid emulsion. Autoradiographic exposure was for 21 days.

### $\beta$ -galactosidase staining and histology

$\beta$ -galactosidase staining was performed according to standard protocols. For histological analysis tissues were fixed overnight with 4% paraformaldehyde at 4°C, dehydrated and embedded in paraffin wax (Vogel). Sections that were 6  $\mu$ m thick were stained with Hematoxylin/Eosin.

### Immunofluorescence and immunohistochemistry

We fixed tissues in 4% paraformaldehyde at 4°C overnight. Sections that were 6  $\mu$ m thick were hydrated and nonspecific binding was blocked in 5% serum corresponding to the secondary antibody in 1xTBS + 0.4% Triton X-100. Reactions were performed with the following primary antibodies: rabbit polyclonal antibody against MSY2 (1:4000 dilution; kindly provided by R. Schultz, University of Pennsylvania), rabbit polyclonal antibody against *lacZ* (dilution 1:400; ICN), mouse monoclonal antibody against PCNA (dilution of 1:200; DAKO) and rat monoclonal antibody against GCNA (undiluted; kindly provided by G. Enders, University of Kansas Medical Center). Primary antibodies were incubated overnight at 4°C. Successful staining for PCNA required antigen retrieval methods. Sections were treated for 20 minutes with 2 N HCl. Slides were washed twice with TBS+0.4% Triton X-100 followed by an incubation for one hour at room temperature with one of the following antibodies: Alexa 488, Alexa 594 and Rhodamine Red (dilution 1:400 for all; Molecular Probes). PCNA detection was accomplished using the M.O.M. Peroxidase Kit (Vector Laboratories).

### TUNEL assay

Ovaries were stained for apoptotic cells by a modified TUNEL method using the ApopTag Peroxidase In Situ Apoptosis Detection Kit (Intergen) following the manufacturer's instructions. Sections were counterstained with Methyl Green (Vector Laboratories).

### Protein analysis

P1 ovaries were suspended in lysis buffer [100 mM Pipes pH 6.5, 150 mM NaCl, 1% IGEPAL (Sigma), 0.05%  $\beta$ -mercaptoethanol, Complete Mini (Roche) and 10  $\mu$ g/ml pepstatin (Chemicon)]. Extracts were then sonicated, spun down on centricon columns (Millipore) and washed twice (100 mM Pipes, 100 mM NaCl, 0.05%  $\beta$ -mercaptoethanol and Complete Mini). Washed extracts were diluted in washing buffer and directly subjected to western blot analysis. For western blot analysis, protein samples were separated by SDS-PAGE, blotted onto nitrocellulose, and immunodetection was performed with an enhanced chemiluminescence system (Amersham Biosciences).

## Results

### Targeted disruption and ovarian expression of *Foxl2*

A *Foxl2<sup>lacZ</sup>* allele was generated by homologous recombination in ES cells, replacing sequences encoding amino acids 62-375 and part of the 3'-untranslated region with *lacZ* in frame with the first ATG (Fig. 1A). This results in almost complete deletion of the WH domain and also allows convenient localization of *Foxl2* expression. Positive clones were verified by Southern blot analysis (Fig. 1B). Two positive ES cell clones were injected and germline transmission was obtained for both of them. To verify the functional inactivation of *Foxl2*, we analysed whole cell protein extracts from neonatal ovaries of *Foxl2<sup>lacZ</sup>* homozygous mutant mice and littermate controls. Western blot analysis of WT extract with an antibody directed against the N-terminus of *Foxl2* showed a doublet band that was absent in ovarian extracts from neonatal *Foxl2<sup>lacZ</sup>* homozygous mutant mice; instead the *Foxl2*-*lacZ* fusion protein is detected (Fig. 1C).

Previous studies have detected *Foxl2* transcripts in the granulosa cells of the adult ovary (Crisponi et al., 2001). Using the *Foxl2<sup>lacZ</sup>* allele, we determined that *Foxl2* expression is activated in the gonads of female mice already around 12.5 dpc, exactly at the time when sex-specific cord-like structures become apparent in the indifferent gonad in males (Fig. 2A,B). This implies that signals must exist in the gonad around 12.5 dpc, which either induce the expression of *Foxl2* specifically in females or suppress its expression in males. *Foxl2* continues to be expressed in mesenchymal pregranulosa cells, which start to break down the oocyte syncytium to form primordial follicles around birth (Fig. 2C,D). *Foxl2* expression is maintained in granulosa cells of early follicles but declines at later stages of folliculogenesis (Fig. 2E,F). The expression pattern of *Foxl2* suggests that determination of somatic cells to a granulosa cell fate occurs very early in ovary organogenesis. <sup>35</sup>S-in situ hybridization experiments confirmed the expression patterns observed with  $\beta$ -galactosidase staining (data not shown).

### Ovarian failure in *Foxl2<sup>lacZ</sup>* homozygous mutant female mice

Intercrosses of *Foxl2<sup>lacZ</sup>* heterozygotes generated homozygous *Foxl2<sup>lacZ</sup>* mutants which were born at the expected Mendelian frequency. On a 129/BlackSwiss/CD1 mixed background 95% of mutant animals were lost before weaning, most probably because of craniofacial defects (to be described elsewhere). However, the remaining 5% of mutant animals lived up to one year. Heterozygous *Foxl2<sup>lacZ</sup>* mutant female mice were subfertile, whereas homozygous mutant *Foxl2<sup>lacZ</sup>* female mice were infertile because of ovarian failure. In contrast, homozygous mutant *Foxl2<sup>lacZ</sup>* male animals were fully fertile.

To elucidate the ovarian defect in *Foxl2<sup>lacZ</sup>* homozygous mutant female mice, we first performed a histological comparison between neonatal WT and *Foxl2<sup>lacZ</sup>* homozygous mutant ovaries. Around birth, the somatic cells are recruited by germ cells and shortly after birth, the oocytes have formed well-defined primordial follicles in which the 12–15  $\mu$ m diameter germ cells are surrounded by a single layer of squamous or flattened granulosa cells, enclosed together within an outer basal lamina. Comparable numbers of germ cells were present in WT and *Foxl2<sup>lacZ</sup>* homozygous mutant neonatal ovaries and primordial follicles were developed. Furthermore, we counted the number of primordial follicles/oocytes during the first three postnatal days in WT and *Foxl2<sup>lacZ</sup>* homozygous mutant ovaries and did not observe any significant statistical difference (Fig. 3A,B and data not shown). Oocytes remain in the prophase of the first meiotic division until shortly after birth when they arrest at the late diplotene or dictyate stage of the first meiotic division. To see if the formed primordial follicles have progressed through prophase of the first meiotic division, immunofluorescence was performed with antibodies that distinguish specific meiotic stages of oocyte development. Gcnal (germ cell nuclear antigen 1) is a marker of the germ

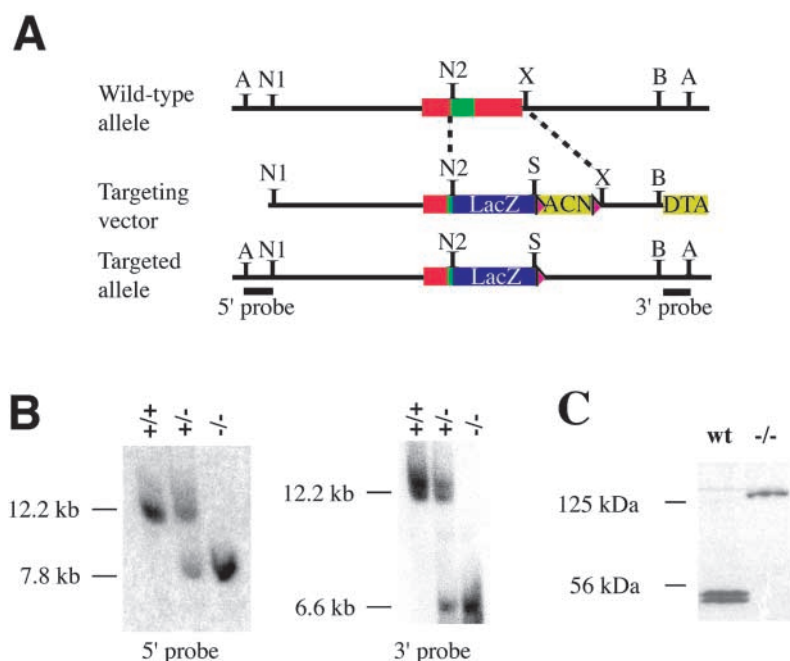

**Fig. 1.** Generation of a *Foxl2<sup>lacZ</sup>* allele by homologous recombination. (A) Genomic structure of *Foxl2* locus showing the single coding exon (red box) containing the WH/forkhead domain (green box). The targeting vector contains a *lacZ* cassette (blue box) in frame with the first ATG and a loxP-flanked neomycin-resistance (pACN) cassette replacing sequences encoding amino acids 62–375 and part of the 3' untranslated region. A diptheria toxin (DTA) cassette was included for negative selection. A, Asp718; B, *Bsa*BI; N1, *Nhe*I; N2, *Nco*I; S, *Spe*I; X, *Xho*I. (B) Southern blot analysis of genomic tail DNA probed with a 5'- and 3'-outside probe, respectively. Genomic DNA was digested with Asp718/*Spe*I. The 5' probe detects the expected 12.2 kb WT band and the 7.8 kb mutant band, whereas the 3' probe detects the 12.2 kb WT band and a 6.6 kb fragment after removal of the selection cassette. (C) Protein was extracted from P1 ovaries of WT and mutant mice and analysed by western blot analysis using the anti-Foxl2 antibody directed against the N-terminus of Foxl2. In WT extracts a doublet band was detected at around 50 kDa. This doublet band disappears in *Foxl2<sup>lacZ</sup>* mutant ovary extracts. Instead the *Foxl2LacZ* fusion protein is detected at 125 kDa.

cell lineage until they reach the diplotene/dictyate stage of the first meiotic division, an arrested stage that persists from shortly after birth until just prior to ovulation (Enders and May, 1994). In contrast, expression of MSY2, encoding a cytoplasmic RNA-binding protein, starts after oocytes have entered the diplotene stage and persists into the dictyate stage (Yu et al., 2001). Antibodies for each marker were added simultaneously to ovarian sections. Confocal analysis revealed no difference between *Foxl2<sup>lacZ</sup>* homozygous mutant and WT ovaries (Fig. 3C). In addition, no difference in *FIGA* expression, a germ cell-specific transcription factor required for ovarian follicle formation, was detected in *Foxl2<sup>lacZ</sup>* heterozygous or homozygous mutant ovaries (Soyal et al., 2000) (data not shown).

In mice and rats, the oocyte starts to grow, when it is surrounded by approximately 10, mostly cuboidal granulosa cells in the largest cross-section. The presence of predominantly cuboidal granulosa cells seems to be a precondition for oocyte growth (Arendsen de Wolff-Exalto and Groen-Klevant, 1980; Braw-Tal and Yossefi, 1997; Lintern-Moore and Moore, 1979). The first wave of follicular growth



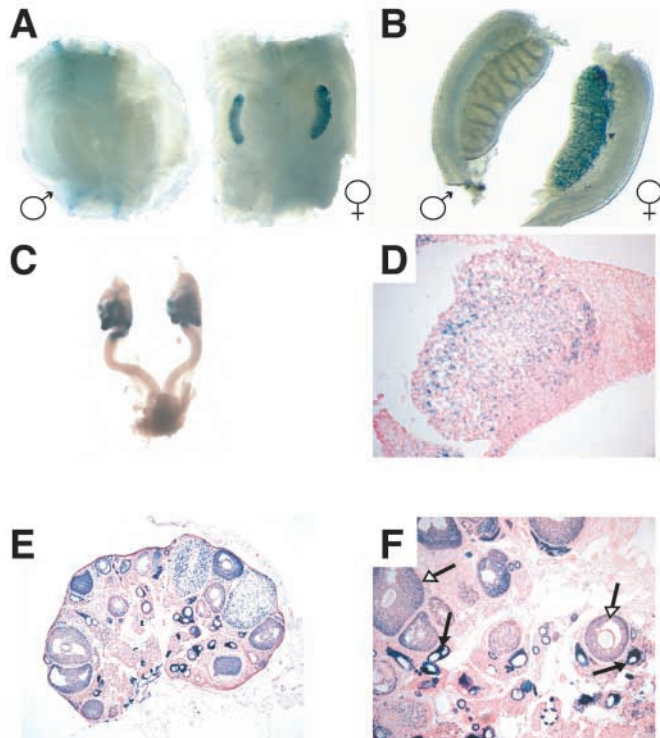

**Fig. 2.** *Foxl2<sup>lacZ</sup>* expression during organogenesis of the ovary.  $\beta$ -galactosidase staining of 12.5 dpc gonads (A,B), newborn (C,D) and adult ovaries (E,F) from *Foxl2<sup>lacZ</sup>* heterozygous animals. (A,B) *Foxl2<sup>lacZ</sup>* expression is sexually dimorphic. No expression is detected in male gonads, whereas *Foxl2<sup>lacZ</sup>* expression starts at around 12.5 dpc in female gonads. (C,D) In newborns *Foxl2<sup>lacZ</sup>* expression is detected in the somatic cells of the ovary. (E,F) In adult ovaries *Foxl2<sup>lacZ</sup>* expression is seen in granulosa cells with the highest levels in early follicles (black arrowheads), whereas expression declines during later stages of folliculogenesis (white arrowheads).

is initiated in the inner part of the cortex, at the corticomedullary junction (Hirshfield, 1992). In ovaries of 2-week-old WT mice many secondary follicles containing two or more layers of cuboidal granulosa cells were seen (Fig. 4A). In contrast, only few follicles where the oocyte had

substantially grown were seen close to the rete ovarii in *Foxl2<sup>lacZ</sup>* homozygous mutant ovaries and these never contained two layers of granulosa cells (Fig. 4B,C). These 'mutant follicles' contained oocytes that had grown but undergone atresia and contained many less granulosa cells compared with WT follicles with a similar oocyte size (Pedersen and Peters, 1968). Most importantly, the granulosa cells in these 'mutant follicles' did not complete the squamous to cuboidal transition which is highly characteristic for granulosa cells at this developmental stage. At 8 weeks of age, almost all follicles had entered this 'mutant follicle stage' (Fig. 4E,F). Although oocytes were surrounded by only a few flattened or squamous-like granulosa cells, most of them had grown to nearly full size at this stage (Fig. 5C,D). Quiescent primordial follicles were not found in serially sectioned *Foxl2<sup>lacZ</sup>* homozygous mutant ovaries at this stage, indicating a total depletion of the primordial follicle pool. In contrast to the 2-week-old mutant ovaries, widespread follicular atresia was observed in 8-week-old *Foxl2<sup>lacZ</sup>* ovaries (Fig. 5E-H). In addition, an increase in zona pellucida remnants was found,

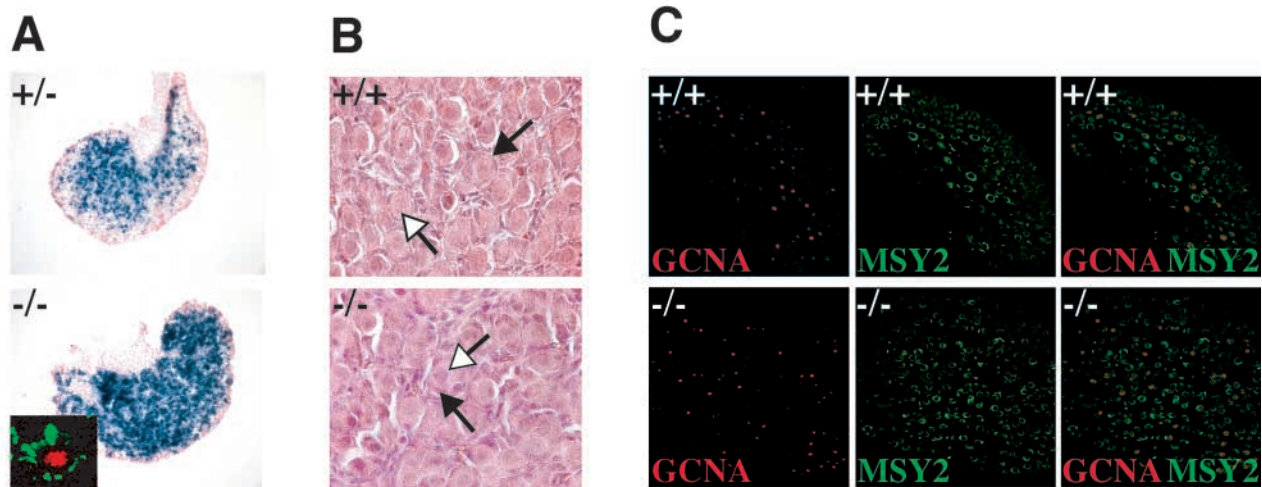

**Fig. 3.** Maturation state of primordial follicles in WT and *Foxl2<sup>lacZ</sup>* homozygous mutant ovaries. (A) *Foxl2<sup>lacZ</sup>* expression determined by  $\beta$ -galactosidase staining in newborn heterozygous and homozygous *Foxl2<sup>lacZ</sup>* ovaries.  $\beta$ -galactosidase staining is more intense in *Foxl2<sup>lacZ</sup>* homozygous mutant ovaries than in *Foxl2<sup>lacZ</sup>* heterozygous ovaries because of the two *lacZ* alleles present showing that there is no somatic cell loss in mutant ovaries. The inset section shows a representative primordial follicle from a double immunofluorescence staining of a mutant newborn ovary with anti-*lacZ* (green) and anti-GCNA (red) antibodies. *LacZ* expression was only detected in somatic cells but not in oocytes. (B) Hematoxylin and Eosin staining of P1 WT and mutant ovaries. Formation of primordial follicles was observed in WT and mutant ovaries (black arrowhead marking squamous granulosa cells; white arrowhead marking oocyte). (C) Immunofluorescence for Gcna1 (red) and MSY2 (green) on WT and mutant newborn ovaries. Gcna1 is expressed in germ cells until the pachytene stage of the prophase of Meiosis I, whereas MSY2 expression starts at the diplotene stage of Meiosis I. Comparison of WT and mutant neonatal ovaries shows no apparent difference in the expression profile of the two proteins, providing evidence that primordial follicles have progressed through the prophase of Meiosis I. Corresponding pictures are photographed at the same magnification.

**Fig. 4.** Representative histological overview of WT and *Foxl2<sup>lacZ</sup>* homozygous mutant ovaries at 2 weeks, 8 weeks and 16 weeks after birth (w, weeks). Overview of different stages of folliculogenesis in WT and mutant mice (A–I). (A) Two weeks after birth a cohort of secondary or preantral follicles with two layers of cuboidal granulosa cells have developed in WT ovaries (asterisks). (B) In contrast, only a few oocytes show substantial growth surrounded by a single layer of squamous-like granulosa cells close to the rete ovarii (asterisks) that never contained two layers of granulosa cells in *Foxl2<sup>lacZ</sup>* homozygous mutant ovaries. (C) Higher magnification of B; two advanced mutant follicles are shown where the oocytes are already undergoing atresia (black arrow, squamous-like granulosa cells; o, oocyte). (D) At 8 weeks of age, all stages of follicular development are seen in WT ovaries. (E) In contrast, despite the substantial growth of all oocytes in *Foxl2<sup>lacZ</sup>* homozygous mutant ovaries, widespread follicular atresia is observed. (F) Higher magnification of E; mutant follicles with large atretic oocytes are shown that are surrounded by only a single layer of squamous-like granulosa cells (black arrow, squamous-like granulosa cells; o, oocyte). (C,F) Granulosa cells did not complete the squamous to cuboidal transition which is particularly evident in the advanced follicles in 2- and 8-week-old *Foxl2<sup>lacZ</sup>* homozygous mutant ovaries. (G) At 16 weeks of age all stages of follicular development are still seen in WT ovaries. (H) At this stage the mutant ovary in *Foxl2<sup>lacZ</sup>* homozygous mutant mice is only one-twentieth the size of a WT ovary. (I) Only very few oocyte remnants (black arrow) and disorganized granulosa cells are retained in mutant ovaries. Corresponding pictures are photographed at the same magnification.

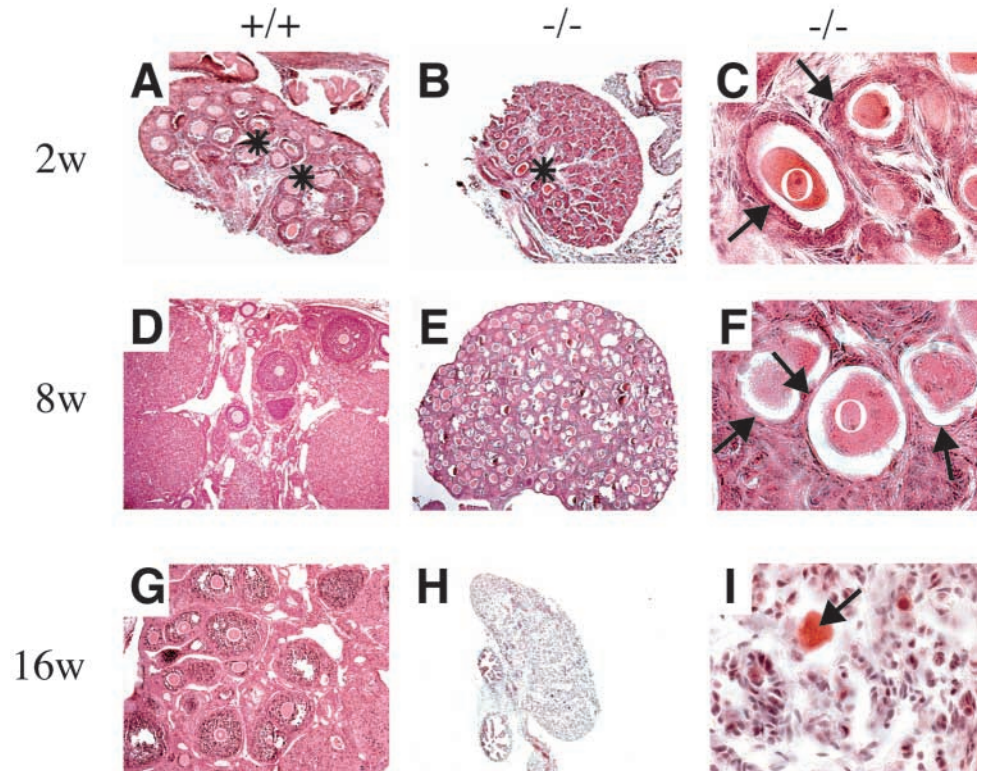

which are remnants of oocytes that have undergone atresia subsequent to synthesis of the zona pellucida (Fig. 4E and data not shown). Concomitant with the block in the squamous to cuboidal transition, we could not detect any signs of granulosa cell proliferation using PCNA as a marker in the 2- and 8-week-old *Foxl2<sup>lacZ</sup>* homozygous mutant ovaries (Fig. 5I–L). At 16 weeks the shrunken *Foxl2<sup>lacZ</sup>* homozygous mutant ovaries were one-twentieth the size of a WT ovary and were devoid of any normal healthy oocytes and follicles (Fig. 4H,I).

Thus, the *Foxl2<sup>lacZ</sup>* homozygous mutant ovarian phenotype was fully penetrant by the end of the second postnatal week. We can therefore exclude any contribution of a pituitary gland defect to the ovarian mutant phenotype as several studies have established that the early stages of folliculogenesis do not depend on pituitary hormones, and that in mice this independence persists for at least two weeks after birth (Hillier, 2001; Kendall et al., 1995; Peters et al., 1975). In addition, *Foxl2<sup>lacZ</sup>* homozygous mutant males were fully fertile, demonstrating that there was no disruption of the hypothalamic-pituitary-gonadal axis although *Foxl2* is expressed in the pituitary gland (Treier et al., 1998).

#### Molecular characterization of the follicle defect

To further investigate the molecular defects underlying the *Foxl2<sup>lacZ</sup>* homozygous mutant phenotype, we used <sup>35</sup>S-in situ hybridization analysis to visualize the expression of molecules

crucial for folliculogenesis (Fig. 6). *Foxl2* itself is expressed in granulosa cells during folliculogenesis. Using an in situ probe localized in the 5'-non-deleted region of *Foxl2*, we followed its expression in WT and *Foxl2<sup>lacZ</sup>* homozygous mutant ovaries (Fig. 6A). *Foxl2* expression was indistinguishable between WT and mutant newborn ovaries at P1. In 2-week-old ovaries, *Foxl2* expression was strong in preantral follicles. In contrast, mutant ovaries displayed a more uniform expression consistent with the altered morphological appearance. In 16-week-old mutant ovaries *Foxl2* expression declined to low levels.

The factors regulating initiation of follicle growth are still poorly understood, however in vitro and in vivo data have implicated activins and *Amh* in this process (Durlinger et al., 2002; Mizunuma et al., 1999). Therefore, we investigated the expression pattern of activin- $\beta$ A, activin- $\beta$ B and *Amh* in WT and *Foxl2<sup>lacZ</sup>* homozygous mutant ovaries at different time points of ovary organogenesis. It has been demonstrated that follicles with multi-layers of granulosa cells co-incubated with primordial/primary follicles arrest the development of the smaller follicles in vitro (Mizunuma et al., 1999). Activin- $\beta$ A message is not detectable in the one-layered follicles and only becomes expressed in the secondary follicle stage. Consistent with the observed absence of secondary follicles in *Foxl2<sup>lacZ</sup>* homozygous mutant ovaries, activin- $\beta$ A expression was not detectable at any stage in *Foxl2<sup>lacZ</sup>* homozygous mutant ovaries (Fig. 6B). In contrast, activin- $\beta$ B was still expressed in



*Foxl2<sup>lacZ</sup>* homozygous mutant ovaries (Fig. 6C). The activin-binding protein follistatin is expressed in overlapping patterns with activin- $\beta$ A and activin- $\beta$ B in the WT ovary. As early as P1 we found a significant decrease in follistatin expression in *Foxl2<sup>lacZ</sup>* homozygous mutant ovaries that stayed just above the detection limit in older mutant ovaries (Fig. 6D). In contrast, we saw no change in the expression pattern for inhibin- $\alpha$  (Fig. 6E). It has been postulated that Amh may play an important inhibitory role in primordial follicle recruitment, such that more primordial follicles are recruited in *Amh*-deficient mice than in WT animals (Durlinger et al., 2002). *Amh* expression in *Foxl2<sup>lacZ</sup>* homozygous mutant ovaries was significantly diminished compared with WT ovaries because of the lack of secondary follicles (Fig. 6F). Thus, factors implicated in the suppression of primordial follicle activation by in vitro studies, most notably activin- $\beta$ A and Amh, are absent or strongly diminished in *Foxl2<sup>lacZ</sup>* homozygous mutant ovaries.

It has been shown that murine folliculogenesis is regulated by the interplay of Kit ligand (Kitl) and growth differentiation factor 9 (Gdf9), a TGF- $\beta$  family member, once a primordial follicle is activated. Gdf9 is an oocyte-derived growth factor

synthesized from the primary one-layer or type 3a follicle stage until after ovulation and required for somatic cell function in vivo (Dong et al., 1996; Elvin et al., 1999). Unexpectedly, at P14 most if not all oocytes in *Foxl2<sup>lacZ</sup>* homozygous mutant ovaries had activated *Gdf9* expression (Fig. 6G). This indicates that almost all follicles have already initiated folliculogenesis at this stage (Elvin et al., 1999).

Kitl is expressed in pregranulosa and granulosa cells and is essential for survival and proliferation of primordial germ cells and has also been implicated in initial primordial follicle activation (Bedell et al., 1995; Huang et al., 1993; Klinger and De Felici, 2002). Interestingly, *Kitl* was strongly expressed throughout all analysed stages and even persisted at high levels in 16-week-old *Foxl2<sup>lacZ</sup>* homozygous mutant ovaries (Fig. 6H).

Several structural cell surface molecules (e.g. E-cadherin, connexin37, connexin43,  $\alpha$ 6 and  $\beta$ 1 integrins) have been implicated in early ovarian folliculogenesis (Ackert et al., 2001; Burns et al., 2002; Di Carlo and De Felici, 2000; Simon et al., 1997). RT-PCR did not reveal any qualitative differences in the expression of these molecules between *Foxl2<sup>lacZ</sup>*

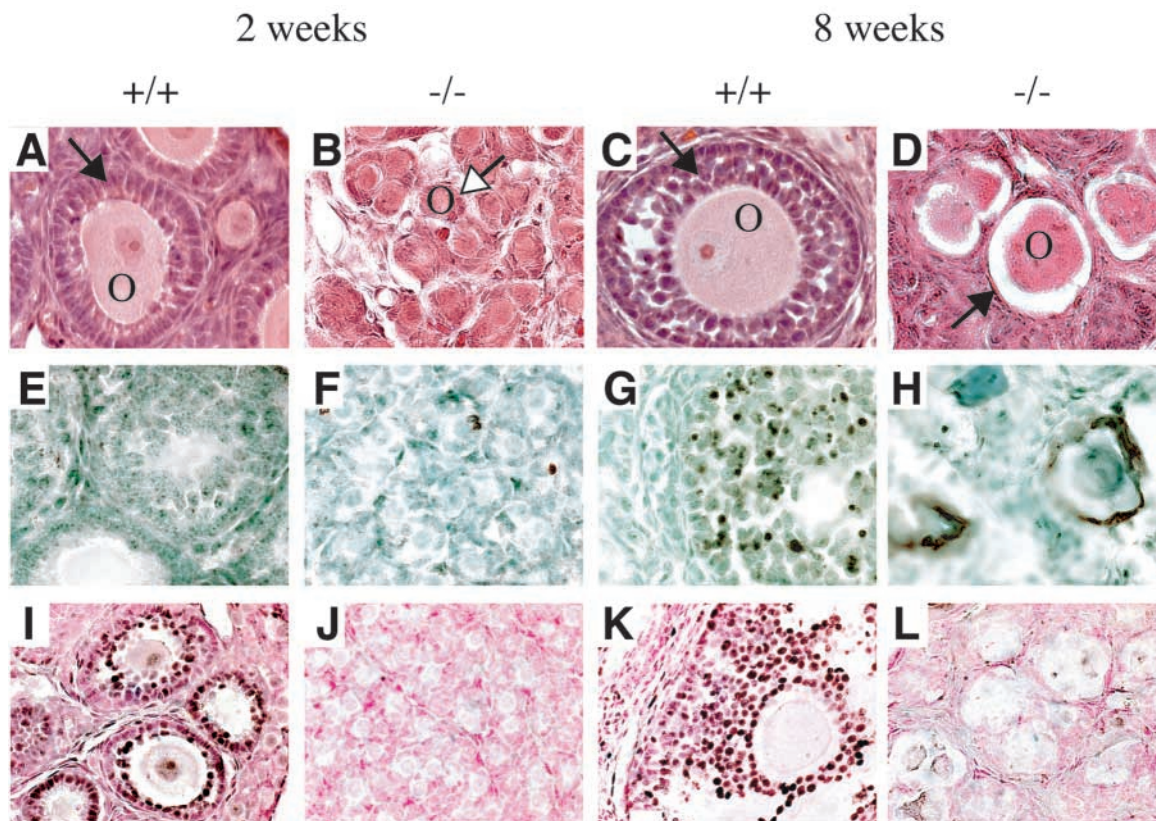

**Fig. 5.** Proliferation status of WT and *Foxl2<sup>lacZ</sup>* homozygous mutant ovaries. (A-D) High magnifications of Hematoxylin and Eosin stainings showing WT and *Foxl2<sup>lacZ</sup>* homozygous mutant follicles 2 weeks and 8 weeks after birth. (A) Secondary follicle in WT ovaries 2 weeks after birth (black arrow, cuboidal granulosa cells; o, oocyte). (B) Primordial follicles in mutant ovaries 2 weeks after birth (white arrow, squamous granulosa cells; o, oocyte). (C) Preantral follicle in WT ovaries 8 weeks after birth (black arrow, cuboidal granulosa cells; o, oocyte). (D) Atretic follicles in mutant ovaries 8 weeks after birth (black arrow, squamous-like granulosa cells; o, oocyte). (E-H) Detection of apoptosis by TUNEL assay in WT and *Foxl2*-deficient follicles. (E,F) There is almost no apoptosis detectable in WT or in *Foxl2<sup>lacZ</sup>* homozygous mutant ovaries 2 weeks after birth. (G) An antral follicle in an 8-week-old WT ovary showing apoptotic nuclei in the granulosa cells. (H) Atretic follicles in 8-week-old mutant ovaries stain positive in the squamous-like granulosa cells. (I-L) Staining of control and *Foxl2<sup>lacZ</sup>* homozygous mutant ovaries with an anti-PCNA antibody. (I) Two weeks after birth granulosa cells in primary and secondary follicles stain positive for PCNA, whereas no staining is detectable in *Foxl2<sup>lacZ</sup>* homozygous mutant ovaries (J). (K) Positive PCNA staining in granulosa cells of an antral follicle in the WT ovaries. (L) In contrast, no staining was observed in the mutant ovary.



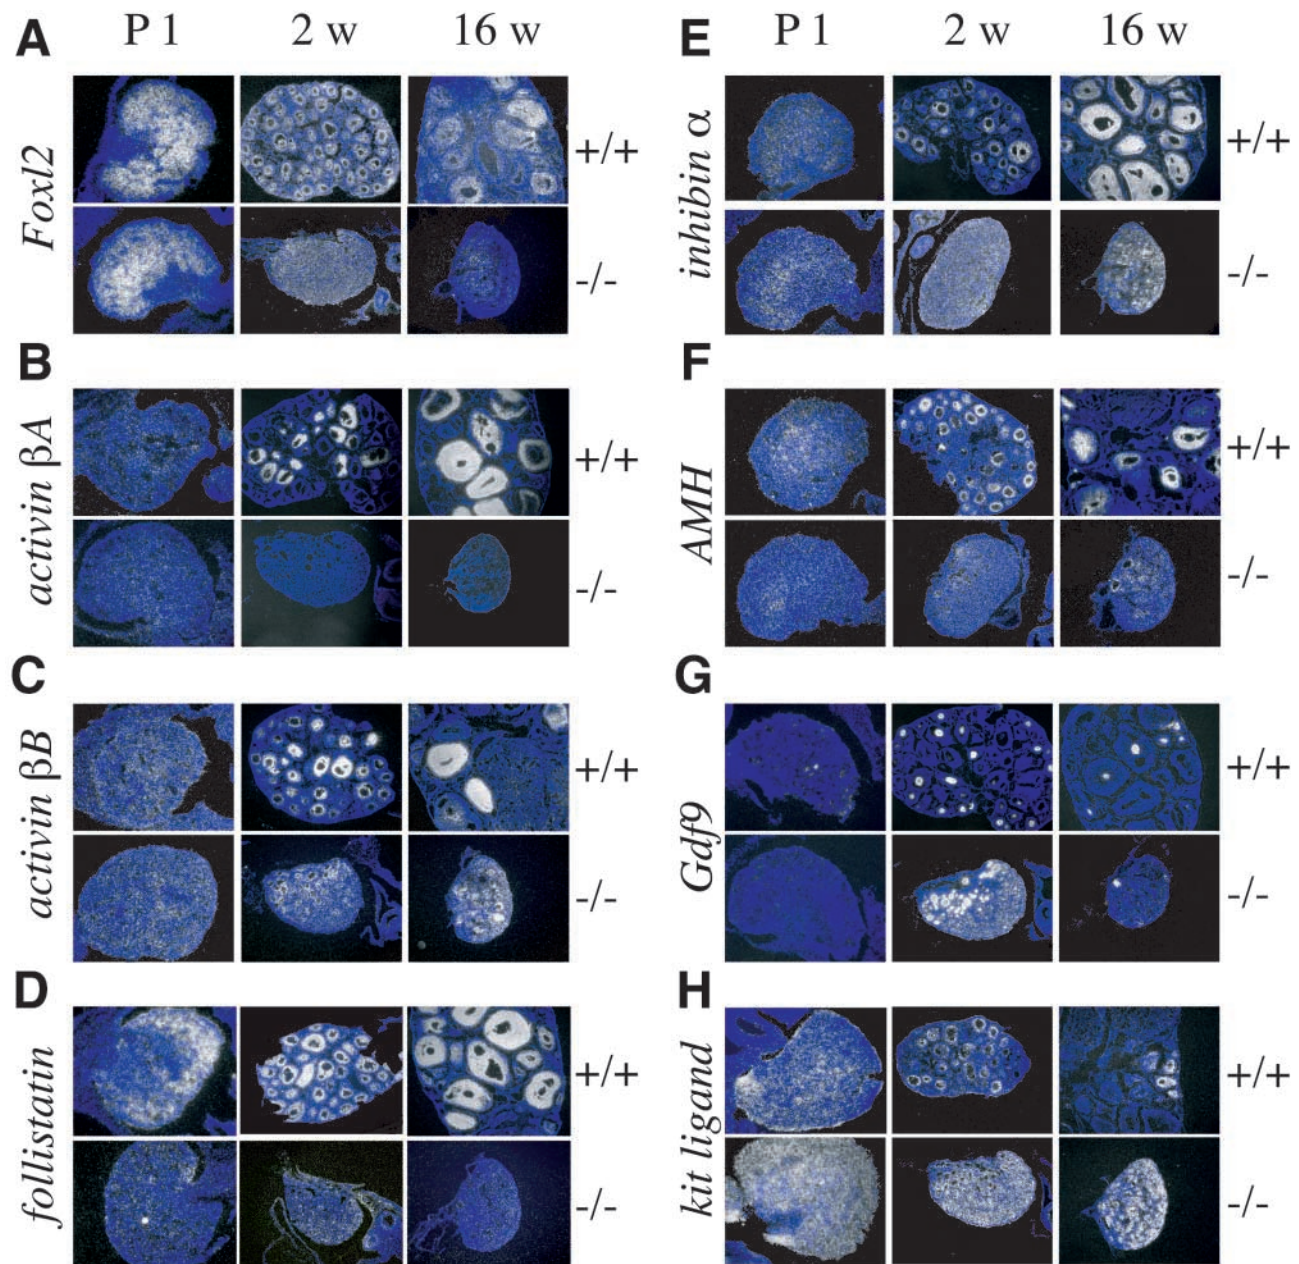

**Fig. 6.** <sup>35</sup>S-in situ hybridization analysis of *Foxl2*, activin-βA, activin-βB, follistatin, inhibin-α, *Amh* (anti-Müllerian inhibiting hormone), *Gdf9* and *Kitl*, at different stages of ovary organogenesis (P, postnatal day; w, weeks). (A) *Foxl2* is expressed in granulosa cells at early stages of folliculogenesis, whereas its expression declines to low levels in adult mutant ovaries. (B) In 2-week-old ovaries activin-βA is localized to granulosa cells of antral follicles, whereas it is absent in *Foxl2*-deficient ovaries. (C) In contrast, activin-βB expression is unaltered in mutant ovaries compared with WT ovaries. (D) Expression of follistatin was significantly downregulated in *Foxl2*<sup>lacZ</sup> homozygous mutant ovaries after P1. (E) Expression of inhibin-α was not affected in mutant ovaries. (F) The expression pattern of *Amh*, which is implicated in the activation of primordial follicles, exhibits significantly reduced expression levels in *Foxl2*<sup>lacZ</sup> homozygous mutant ovaries. (G) *Gdf9* expression starts at the type 3a follicle stage in WT oocytes. In the 2-week-old *Foxl2*<sup>lacZ</sup> homozygous mutant ovary all oocytes express *Gdf9*, including regions that correspond histologically to Fig. 5B. (H) *Kitl* is expressed in pregranulosa and granulosa cells during folliculogenesis. In *Foxl2*<sup>lacZ</sup> homozygous mutant ovaries *Kit* ligand expression is maintained at all stages. At least three different ovaries were analysed per time point.

homozygous mutant ovaries and WT ovaries at P1 (data not shown).

## Discussion

*Foxl2* is expressed throughout ovarian development. However,

*Foxl2* function in the ovary first becomes essential during initial primordial follicle recruitment after birth. The failure of granulosa cells in *Foxl2*<sup>lacZ</sup> homozygous mutant mice to complete the squamous to cuboidal transition indicates that *Foxl2* is essential for granulosa cell differentiation. It has been shown that granulosa cells only start to proliferate once they

have changed their shape from squamous to cuboidal (Meredith et al., 2000). Consistent with this observation we hardly detect any granulosa cell proliferation in *Foxl2<sup>lacZ</sup>* homozygous mutant follicles. Surprisingly, most of the oocytes grow and subsequently undergo atresia because of the absence of follicular cell support, suggesting that granulosa cell function is not only required for oocyte growth but also to maintain follicular quiescence. The observed general oocyte activation correlates with the absence of secondary follicles in *Foxl2<sup>lacZ</sup>* homozygous mutant ovaries, leading to a complete depletion of the primordial follicle reserve pool in 8-week-old *Foxl2<sup>lacZ</sup>* homozygous mutant females.

Factors that trigger the primordial to primary follicle transition in vivo are largely unknown, although somatic cell-derived *Kitl* and *Amh* are implicated in the regulation of this process (Durlinger et al., 2002; Klinger and De Felici, 2002; Parrott and Skinner, 1999). Furthermore, it has been suggested that factors secreted from late stage follicles modulate the activation of primordial follicles (Durlinger et al., 2002; Mizunuma et al., 1999). Most notably *Amh* and activin- $\beta$ A have been proposed as inhibitory factors, whereas follistatin secreted by cuboidal granulosa cells would protect early follicles from inhibition (Braw-Tal, 2002). The absence or significant downregulation of the inhibitory factors, activin- $\beta$ A and *Amh*, coincides with the precocious activation of almost all primordial follicles in *Foxl2<sup>lacZ</sup>* homozygous mutant ovaries two weeks after birth, as demonstrated by activation of *Gdf9* expression in oocytes. Neonatal rat ovaries cultured in the presence of *Kitl* display a higher rate of primordial to primary follicle transition (Klinger and De Felici, 2002; Parrott and Skinner, 1999). Thus, the high expression level of *Kitl* in the absence of inhibitory factors in *Foxl2<sup>lacZ</sup>* homozygous mutant neonatal ovaries is consistent with the proposed role for *Kitl* in primordial follicle activation in vivo. Together these data indicate that suppressors of initial primordial follicle activation such as activin- $\beta$ A and *Amh* expressed by advanced follicles may regulate the primordial to primary follicle transition in vivo, supporting the proposed model that initially oocyte growth follows, rather than precedes, the changes in granulosa cells (Braw-Tal, 2002; Fortune et al., 2000; Kezele et al., 2002). However, further studies will have to show if additional, as yet unknown *Foxl2*-regulated suppressors of primordial follicle activation exist that are absent in *Foxl2<sup>lacZ</sup>* homozygous mutant ovaries. In this respect it is noteworthy that another distantly related WH/forkhead transcription factor *Foxo3a* has also recently been implicated as a suppressor of ovarian follicle activation (Castrillon et al., 2003). It will be interesting to determine in the future if *Foxo3a* and *Foxl2* share common target genes that are required to maintain primordial follicles in a dormant state.

Subsequent to the initial primordial follicle recruitment, bi-directional signaling between oocytes and surrounding somatic cells is critical for the progression beyond the primary follicle stage (Matzuk et al., 2002). Molecules important in this cross-talk include *Gdf9*, which is secreted by oocytes, and again *Kitl*, which is produced by the granulosa cells (Driancourt et al., 2000). It has been shown that the mammalian oocyte orchestrates the rate of ovarian follicle development once the paracrine oocyte factors *Gdf9* and BMP-15 have been activated (Eppig and O'Brien, 1996; Eppig et al., 2002; Yan et al., 2001). Despite the high expression of *Gdf9* and *Kitl* in *Foxl2<sup>lacZ</sup>*

homozygous mutant ovaries, proliferation of granulosa cells is almost absent, suggesting that only cuboidal granulosa cells may be responsive to mitogenic factors such as *Gdf9* secreted from the oocyte. However, the high level of *Kitl* expression maintained in the mutant ovaries may explain the slow degeneration of the oocytes and the presence of very few degenerated oocyte remnants in 16-week-old *Foxl2<sup>lacZ</sup>* homozygous mutant ovaries.

Although folliculogenesis in *Gdf9* knockout animals is arrested around the same stage as in *Foxl2<sup>lacZ</sup>* homozygous mutant ovaries, there are noticeable phenotypic differences. In the *Gdf9* mutant ovaries the oocyte overgrows and is surrounded by up to two layers of cuboidal granulosa cells before atresia occurs (Dong et al., 1996; Elvin et al., 1999). In contrast, we never observe follicles with a healthy-looking oocyte surrounded by two layers of cuboidal granulosa cells in *Foxl2<sup>lacZ</sup>* homozygous mutant ovaries. However, both factors, *Gdf9* and *Foxl2*, are required for granulosa cell proliferation. Nevertheless, the more severe ovarian phenotype of *Foxl2<sup>lacZ</sup>* homozygous mutant mice compared with *Gdf9* mutant mice suggests that *Foxl2* is involved in additional transcriptional networks. Indeed, molecules such as bFGF and EGF/TGF- $\alpha$  may play complementary roles in these processes and *Foxl2* may be the signaling integrator in the nucleus (Nilsson et al., 2001; Qu et al., 2000).

It has recently been reported that *Foxl2* is not only expressed in somatic cells but also in female germ cells and oocytes during ovarian development (Loffler et al., 2003). However, we cannot detect any expression of *Foxl2* in germ cells/oocytes similar to what has been observed in other studies (Cocquet et al., 2002). In addition, we also do not observe *lacZ* expression of our *Foxl2<sup>lacZ</sup>* allele in germ cells/oocytes, which otherwise faithfully recapitulates the *Foxl2* in situ expression pattern in the whole embryo during development.

*Foxl2*, in combination with *Gata2* and follistatin, is one of the earliest sexually dimorphic genes expressed specifically in the ovary (Menke and Page, 2002; Siggers et al., 2002) and one of two genes affected in the goat polled intersex syndrome (PIS) (Pailhoux et al., 2001). BPES female patients clearly show no sex reversal. However, they are only haploinsufficient for the *FOXL2* mutation. Our results clearly demonstrate that complete loss of *Foxl2* protein function in the mouse is not sufficient to lead to XX sex reversal in female mice. However, it will be interesting to see whether a role for *Foxl2* in primary sex determination will be revealed on a sensitized background for sex determination. Nevertheless, the expression pattern of *Foxl2* together with the results obtained from the *Wnt4* knockout model, supports the current trend toward a change in the dogma that ovary development is the default pathway of gonadal differentiation (Vainio et al., 1999).

In conclusion, the observed infertility in *Foxl2<sup>lacZ</sup>* homozygous mutant females can be explained by the early depletion of the primordial follicle pool. This depletion is because of a premature activation of almost all primordial follicles as a result of granulosa cell differentiation failure and leads to widespread follicular atresia. The absence of activin- $\beta$ A and *Amh*, two suppressors of initial follicle recruitment, may contribute to the observed general loss of follicular quiescence in *Foxl2<sup>lacZ</sup>* homozygous mutant ovaries.

So far, mutations in eight different forkhead genes have been associated with human developmental disorders (Carlsson and



Mahlapuu, 2002). BPES is, to date, the only human autosomal dominant disorder found associated with POF, a disease that affects 1% of women (Pal and Santoro, 2002; Schlessinger et al., 2002).

Our analysis of *Foxl2*<sup>lacZ</sup> homozygous mutant ovaries has provided novel insights into the activation of primordial follicles and ovarian maintenance in vivo and may explain the underlying pathophysiological mechanisms leading to POF in BPES patients. Mouse models of POF such as the *Foxl2*<sup>lacZ</sup> knockout mouse described here will facilitate the identification of additional factors regulating ovarian follicle activation, a process crucial in reproductive biology, and the development of improved contraceptives and potential therapeutic treatments for POF.

We thank K. Vintersten of the Transgenic Service and the staff of the EMBL Laboratory Animal Resources for generation of chimeric animals and expert support. We thank R. Behringer, J. Dean and M. Matzuk for providing in situ probes. G. C. Enders for the GCNA antibody, R. M. Schultz for the MSY2 antibody and K. R. Thomas for the pACN plasmid. This work was supported in part by the Deutsche Forschungsgemeinschaft (DFG, TR-341/2-1) to M.T.

## References

- Ackert, C. L., Gittens, J. E., O'Brien, M. J., Eppig, J. J. and Kidder, G. M. (2001). Intercellular communication via connexin43 gap junctions is required for ovarian folliculogenesis in the mouse. *Dev. Biol.* **233**, 258-270.
- Apter, D. (1997). Development of the hypothalamic-pituitary-ovarian axis. *Ann. New York Acad. Sci.* **816**, 9-21.
- Arendsen de Wolff-Exalto, E. and Groen-Klevant, A. C. (1980). Oocyte growth in the immature rat. *J. Reprod. Fertil.* **59**, 187-192.
- Bedell, M. A., Brannan, C. I., Evans, E. P., Copeland, N. G., Jenkins, N. A. and Donovan, P. J. (1995). DNA rearrangements located over 100 kb 5' of the Steel (Sl)-coding region in Steel-panda and Steel-contrasted mice deregulate Sl expression and cause female sterility by disrupting ovarian follicle development. *Genes Dev.* **9**, 455-470.
- Braw-Tal, R. (2002). The initiation of follicle growth: the oocyte or the somatic cells? *Mol. Cell. Endocrinol.* **187**, 11-18.
- Braw-Tal, R. and Yossefi, S. (1997). Studies in vivo and in vitro on the initiation of follicle growth in the bovine ovary. *J. Reprod. Fertil.* **109**, 165-171.
- Burns, K. H. and Matzuk, M. M. (2002). Minireview: genetic models for the study of gonadotropin actions. *Endocrinology* **143**, 2823-2835.
- Burns, K. H., Owens, G. E., Fernandez, J. M., Nilson, J. H. and Matzuk, M. M. (2002). Characterization of integrin expression in the mouse ovary. *Biol. Reprod.* **67**, 743-751.
- Carlsson, P. and Mahlapuu, M. (2002). Forkhead transcription factors: key players in development and metabolism. *Dev. Biol.* **250**, 1-23.
- Castrillon, D. H., Miao, L., Kollipara, R., Horner, J. W. and DePinho, R. A. (2003). Suppression of ovarian follicle activation in mice by the transcription factor Foxo3a. *Science* **301**, 215-218.
- Cocquet, J., Pailhoux, E., Jaubert, F., Servel, N., Xia, X., Pannetier, M., De Baere, E., Messiaen, L., Cotinot, C., Fellous, M. et al. (2002). Evolution and expression of *FOXL2*. *J. Med. Genet.* **39**, 916-922.
- Crisponi, L., Deiana, M., Loi, A., Chiappe, F., Uda, M., Amati, P., Bisceglia, L., Zelante, L., Nagaraja, R., Porcu, S. et al. (2001). The putative forkhead transcription factor *FOXL2* is mutated in blepharophimosis/ptosis/epicanthus inversus syndrome. *Nat. Genet.* **27**, 159-166.
- De Baere, E., Dixon, M. J., Small, K. W., Jabs, E. W., Leroy, B. P., Devriendt, K., Gillerot, Y., Mortier, G., Meire, F., Van Maldergem, L. et al. (2001). Spectrum of *FOXL2* gene mutations in blepharophimosis-ptosis-epicanthus inversus (BPES) families demonstrates a genotype-phenotype correlation. *Hum. Mol. Genet.* **10**, 1591-1600.
- Di Carlo, A. and De Felici, M. (2000). A role for E-cadherin in mouse primordial germ cell development. *Dev. Biol.* **226**, 209-219.
- Dong, J., Albertini, D. F., Nishimori, K., Kumar, T. R., Lu, N. and Matzuk, M. M. (1996). Growth differentiation factor-9 is required during early ovarian folliculogenesis. *Nature* **383**, 531-535.
- Driancourt, M. A., Reynaud, K., Cortvrindt, R. and Smitz, J. (2000). Roles of KIT and KIT LIGAND in ovarian function. *Rev. Reprod.* **5**, 143-152.
- Durlinger, A. L., Gruijters, M. J., Kramer, P., Karels, B., Ingraham, H. A., Nachtigal, M. W., Uilenbroek, J. T., Grootegoed, J. A. and Themmen, A. P. (2002). Anti-Mullerian hormone inhibits initiation of primordial follicle growth in the mouse ovary. *Endocrinology* **143**, 1076-1084.
- Elvin, J. A., Yan, C., Wang, P., Nishimori, K. and Matzuk, M. M. (1999). Molecular characterization of the follicle defects in the growth differentiation factor 9-deficient ovary. *Mol. Endocrinol.* **13**, 1018-1034.
- Enders, G. C. and May, J. J., 2nd (1994). Developmentally regulated expression of a mouse germ cell nuclear antigen examined from embryonic day 11 to adult in male and female mice. *Dev. Biol.* **163**, 331-340.
- Epifano, O. and Dean, J. (2002). Genetic control of early folliculogenesis in mice. *Trends Endocrinol. Metab.* **13**, 169-173.
- Eppig, J. J. and O'Brien, M. J. (1996). Development in vitro of mouse oocytes from primordial follicles. *Biol. Reprod.* **54**, 197-207.
- Eppig, J. J., Wigglesworth, K. and Pendola, F. L. (2002). The mammalian oocyte orchestrates the rate of ovarian follicular development. *Proc. Natl. Acad. Sci. USA* **99**, 2890-2894.
- Erickson, G. F. (2001). Role of growth factors in ovary organogenesis. *J. Soc. Gynecol. Investig.* **8**, S13-S16.
- Fortune, J. E., Cushman, R. A., Wahl, C. M. and Kito, S. (2000). The primordial to primary follicle transition. *Mol. Cell. Endocrinol.* **163**, 53-60.
- Hillier, S. G. (2001). Gonadotropic control of ovarian follicular growth and development. *Mol. Cell. Endocrinol.* **179**, 39-46.
- Hirshfield, A. N. (1992). Heterogeneity of cell populations that contribute to the formation of primordial follicles in rats. *Biol. Reprod.* **47**, 466-472.
- Huang, E. J., Manova, K., Packer, A. I., Sanchez, S., Bachvarova, R. F. and Besmer, P. (1993). The murine steel panda mutation affects kit ligand expression and growth of early ovarian follicles. *Dev. Biol.* **157**, 100-109.
- Kendall, S. K., Samuelson, L. C., Saunders, T. L., Wood, R. I. and Camper, S. A. (1995). Targeted disruption of the pituitary glycoprotein hormone alpha-subunit produces hypogonadal and hypothyroid mice. *Genes Dev.* **9**, 2007-2019.
- Kezele, P., Nilsson, E. and Skinner, M. K. (2002). Cell-cell interactions in primordial follicle assembly and development. *Front. Biosci.* **7**, 1990-1996.
- Klinger, F. G. and De Felici, M. (2002). In vitro development of growing oocytes from fetal mouse oocytes: stage-specific regulation by stem cell factor and granulosa cells. *Dev. Biol.* **244**, 85-95.
- Lintern-Moore, S. and Moore, G. P. (1979). The initiation of follicle and oocyte growth in the mouse ovary. *Biol. Reprod.* **20**, 773-778.
- Loffler, K. A., Zarkower, D. and Koopman, P. (2003). Etiology of ovarian failure in blepharophimosis ptosis epicanthus inversus syndrome: *FOXL2* is a conserved, early, acting gene in vertebrate ovarian development. *Endocrinology* **144**, 3237-3243.
- Matzuk, M. M. and Lamb, D. J. (2002). Genetic dissection of mammalian fertility pathways. *Nat. Cell Biol.* **4**, s41-s49.
- Matzuk, M. M., Burns, K. H., Viveiros, M. M. and Eppig, J. J. (2002). Intercellular communication in the mammalian ovary: oocytes carry the conversation. *Science* **296**, 2178-2180.
- Menke, D. B. and Page, D. C. (2002). Sexually dimorphic gene expression in the developing mouse gonad. *Gene Expr. Patterns* **2**, 359-367.
- Meredith, S., Dudenhoeffer, G. and Jackson, K. (2000). Classification of small type B/C follicles as primordial follicles in mature rats. *J. Reprod. Fertil.* **119**, 43-48.
- Mizunuma, H., Liu, X., Andoh, K., Abe, Y., Kobayashi, J., Yamada, K., Yokota, H., Ibuki, Y. and Hasegawa, Y. (1999). Activin from secondary follicles causes small preantral follicles to remain dormant at the resting stage. *Endocrinology* **140**, 37-42.
- Nilsson, E., Parrott, J. A. and Skinner, M. K. (2001). Basic fibroblast growth factor induces primordial follicle development and initiates folliculogenesis. *Mol. Cell. Endocrinol.* **175**, 123-130.
- Pailhoux, E., Vigier, B., Chaffaux, S., Servel, N., Taourit, S., Furet, J. P., Fellous, M., Grosclaude, F., Cribiu, E. P., Cotinot, C. et al. (2001). A 11.7-kb deletion triggers intersexuality and polledness in goats. *Nat. Genet.* **29**, 453-458.
- Pal, L. and Santoro, N. (2002). Premature ovarian failure (POF): discordance between somatic and reproductive aging. *Ageing Res. Rev.* **1**, 413-423.
- Parrott, J. A. and Skinner, M. K. (1999). Kit-ligand/stem cell factor induces primordial follicle development and initiates folliculogenesis. *Endocrinology* **140**, 4262-4271.
- Pedersen, T. and Peters, H. (1968). Proposal for a classification of oocytes and follicles in the mouse ovary. *J. Reprod. Fertil.* **17**, 555-557.

- Peters, H., Byskov, A. G., Himelstein-Braw, R. and Faber, M.** (1975). Follicular growth: the basic event in the mouse and human ovary. *J. Reprod. Fertil.* **45**, 559-566.
- Qu, J., Nisolle, M. and Donnez, J.** (2000). Expression of transforming growth factor- $\alpha$ , epidermal growth factor, and epidermal growth factor receptor in follicles of human ovarian tissue before and after cryopreservation. *Fertil. Steril.* **74**, 113-121.
- Schlessinger, D., Herrera, L., Crisponi, L., Mumm, S., Percesepe, A., Pellegrini, M., Pilia, G. and Forabosco, A.** (2002). Genes and translocations involved in POF. *Am. J. Med. Genet.* **111**, 328-333.
- Sherman, S. L.** (2000). Premature ovarian failure in the fragile X syndrome. *Am. J. Med. Genet.* **97**, 189-194.
- Siggers, P., Smith, L. and Greenfield, A.** (2002). Sexually dimorphic expression of Gata-2 during mouse gonad development. *Mech. Dev.* **111**, 159-162.
- Simon, A. M., Goodenough, D. A., Li, E. and Paul, D. L.** (1997). Female infertility in mice lacking connexin 37. *Nature* **385**, 525-529.
- Simpson, J. L. and Rajkovic, A.** (1999). Ovarian differentiation and gonadal failure. *Am. J. Med. Genet.* **89**, 186-200.
- Smitz, J. E. and Cortvrindt, R. G.** (2002). The earliest stages of folliculogenesis in vitro. *Reproduction* **123**, 185-202.
- Soyal, S. M., Amleh, A. and Dean, J.** (2000). FIGalpha, a germ cell-specific transcription factor required for ovarian follicle formation. *Development* **127**, 4645-4654.
- Treier, M., Gleiberman, A. S., O'Connell, S. M., Szeto, D. P., McMahon, J. A., McMahon, A. P. and Rosenfeld, M. G.** (1998). Multistep signaling requirements for pituitary organogenesis in vivo. *Genes Dev.* **12**, 1691-1704.
- Vainio, S., Heikkila, M., Kispert, A., Chin, N. and McMahon, A. P.** (1999). Female development in mammals is regulated by Wnt-4 signalling. *Nature* **397**, 405-409.
- Yan, C., Wang, P., DeMayo, J., DeMayo, F. J., Elvin, J. A., Carino, C., Prasad, S. V., Skinner, S. S., Dunbar, B. S., Dube, J. L. et al.** (2001). Synergistic roles of bone morphogenetic protein 15 and growth differentiation factor 9 in ovarian function. *Mol. Endocrinol.* **15**, 854-866.
- Yu, J., Hecht, N. B. and Schultz, R. M.** (2001). Expression of MSY2 in mouse oocytes and preimplantation embryos. *Biol. Reprod.* **65**, 1260-1270.
